# Supplementary material for: Assessing the mechanism of the synergistic action of calixarenes and Co-dicarbollides in lanthanide extractions
Source: Royal Society of Chemistry journal article supplement (doi:10.1039/c0nj00269k), 2010-01-01

# Supporting Information

## Assessing the Mechanism of the Synergistic Action of Calixarenes and Cobicarbollides in Lanthanides Extraction

Elena Macerata<sup>1</sup>, Franca Castiglione<sup>2</sup>, Walter Panzeri<sup>3</sup>, Mario Mariani<sup>1</sup>, Francesco Sansone<sup>4</sup>, Alessandro Casnati<sup>4\*</sup>, and Andrea Mele<sup>2\*</sup>

<sup>1</sup> Dipartimento di Energia, Sezione Ingegneria Nucleare-CeSNEF - Politecnico di Milano  
via Ponzio 34/3, I-20133 Milano (Italy)  
email: [elena.macerata@polimi.it](mailto:elena.macerata@polimi.it); [mario.mariani@polimi.it](mailto:mario.mariani@polimi.it)

<sup>2</sup> Dipartimento di Chimica, Materiali e Ingegneria Chimica “Giulio Natta” - Politecnico di Milano  
via L. Mancinelli 7, I-20131 Milano (Italy)  
email: [fcastiglione@chem.polimi.it](mailto:fcastiglione@chem.polimi.it); [andrea.mele@polimi.it](mailto:andrea.mele@polimi.it)

<sup>3</sup> CNR-Istituto di Chimica del Riconoscimento Molecolare  
via L. Mancinelli 7, I-20131 Milano (Italy)  
email: [walter.panzeri@polimi.it](mailto:walter.panzeri@polimi.it)

<sup>4</sup> Dipartimento di Chimica Organica ed Industriale - Università di Parma  
viale G. P. Usberti 17/A, I-43100 Parma (Italy)  
email: [francesco.sansone@unipr.it](mailto:francesco.sansone@unipr.it); [alessandro.casnati@unipr.it](mailto:alessandro.casnati@unipr.it)

Figure SI-1. Negative ion polarity ESI-MS spectrum of  $\text{Br}_n\text{CD}^-$  showing the different degree of bromination.

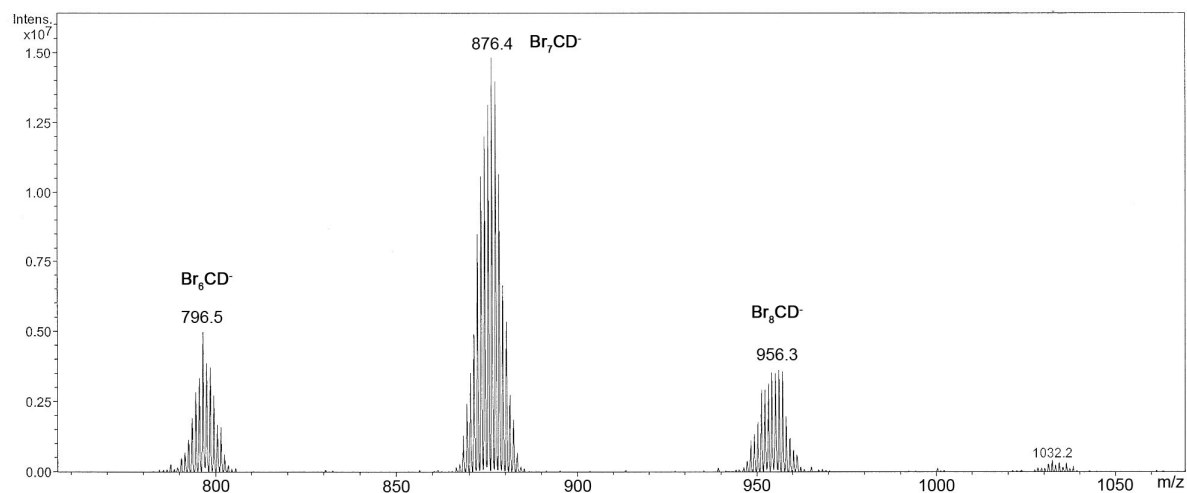

Figure SI-2.  $^1\text{H}$  NMR spectra of a) Calix, b) Calix/ $\text{BrCD}^-$ , c)  $\text{La}^{3+}$ /Calix and d)  $\text{La}^{3+}$ /Calix/ $\text{BrCD}^-$  in  $\text{CD}_3\text{CN}/\text{CDCl}_3$  1:1 ( $T=320$  K).

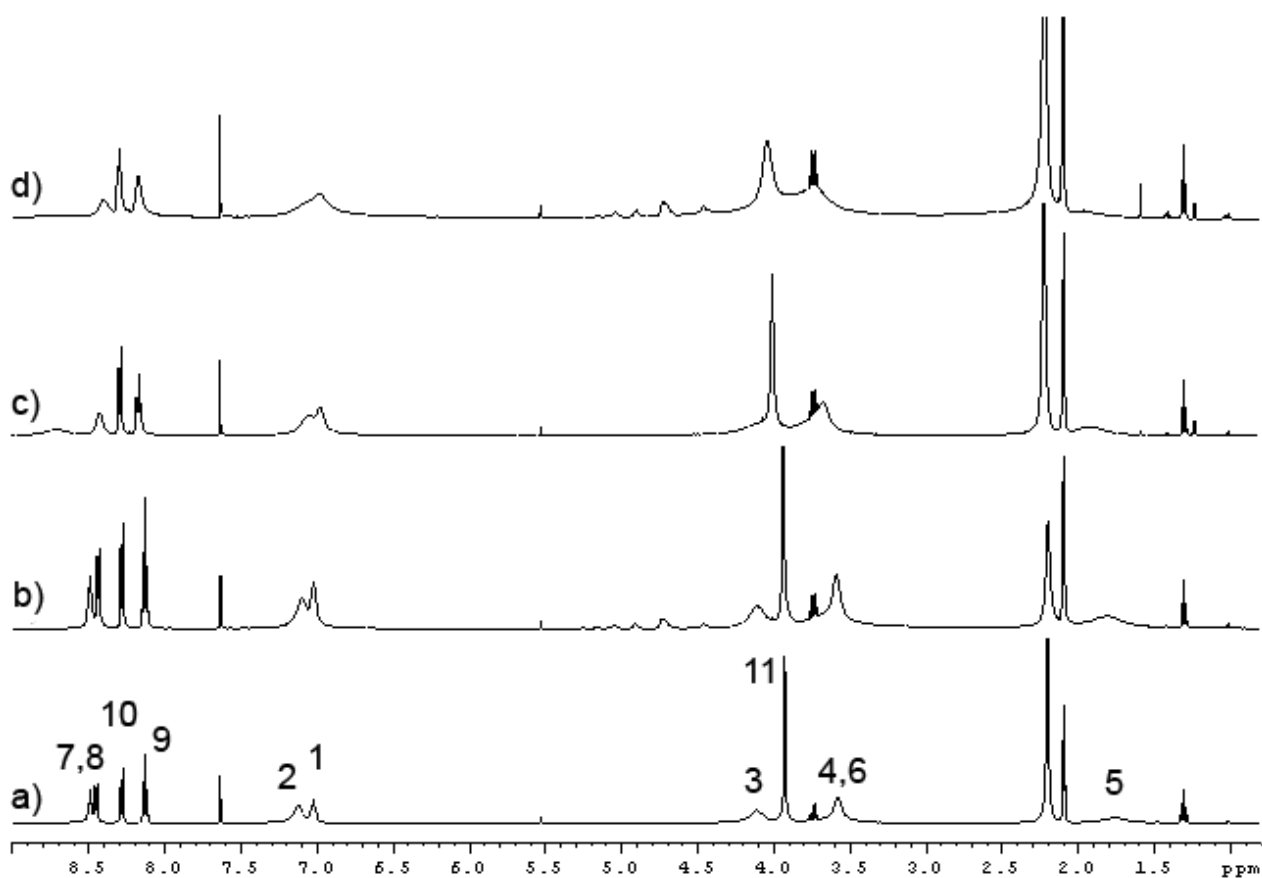

Supplement: c0nj00269k.pdf [file c0nj00269k.pdf]
